# Supplementary material
Source: Springer Nature journal article supplement (https://www.springermedizin.de/resource/supplementary/13054_2011_723_MOESM4_ESM.pdf/9708602)

**A**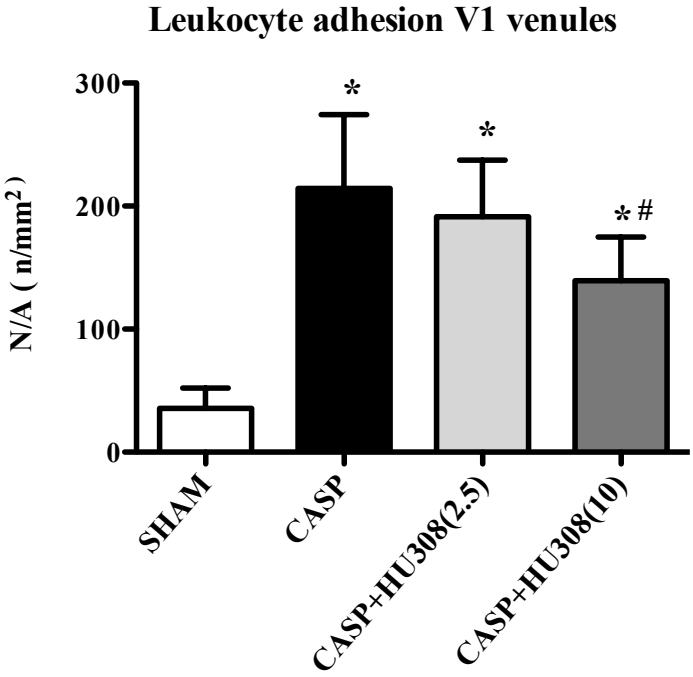**B**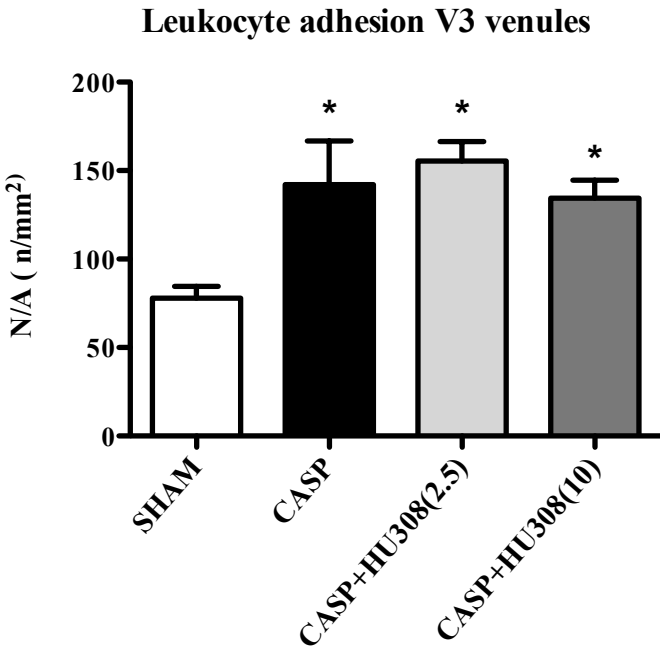

Supplement: MOESM4 [file 9708602]
